# Supplementary material for: Pyroptosis-Related LncRNA Signature Predicts Prognosis and Is Associated With Immune Infiltration in Hepatocellular Carcinoma
Source: Front Oncol. 2022 Mar 3;12:794034. doi: 10.3389/fonc.2022.794034 (PMC8927701; doi:10.3389/fonc.2022.794034)
Supplement: Supplementary file 5 [file Table_4.xlsx]

## Sheet: gene&lncRNA.all
Differentially expressed pyroptosis-related genes.
gene	conMean	treatMean	logFC	pValue	fdr
BAX	18.1166	56.8755	1.6505	1.6546e-23	3.64012e-22
CHMP2A	81.7894	170.945	1.06354	1.09812e-23	3.64012e-22
GSDMD	32.1223	82.4468	1.35989	2.55125e-23	3.74184e-22
PLCG1	3.13903	11.0399	1.81434	2.52634e-21	2.22318e-20
CHMP6	18.2292	37.074	1.02416	2.52634e-21	2.22318e-20
GSDMC	0.0200598	0.655649	5.03054	2.04919e-19	1.50274e-18
CHMP4B	79.3635	161.318	1.02337	2.88046e-19	1.81057e-18
BAK1	6.063	20.5132	1.75845	4.24077e-18	2.33242e-17
CYCS	31.1433	67.6166	1.11845	5.55188e-18	2.71425e-17
CASP3	10.4137	23.1487	1.15245	1.39256e-17	6.12727e-17
CHMP3	5.12345	11.6307	1.18275	1.14436e-16	4.57745e-16
CASP8	3.43877	7.79343	1.18036	1.88957e-15	6.92844e-15
CHMP4C	6.30633	16.4008	1.3789	2.69769e-15	9.13064e-15
GSDMB	3.36169	9.56795	1.50902	8.54984e-15	2.50795e-14
NOD1	0.814171	1.82253	1.16254	2.78342e-14	7.65442e-14
PJVK	0.601545	1.23982	1.04339	3.06492e-11	7.49202e-11
NLRP1	1.00975	2.90654	1.5253	1.21872e-10	2.68119e-10
PYCARD	8.10481	26.1464	1.68976	1.17847e-06	2.0741e-06
IL6	2.18057	0.872599	-1.32132	0.000110069	0.000161435
GSDME	1.04952	3.09623	1.56078	0.000120318	0.000170774
TP63	0.0813732	0.346942	2.09207	0.000758562	0.00104302
IL1A	0.0265345	0.0695207	1.38957	0.0036346	0.00444228
GSDMA	0.212564	0.44564	1.06798	0.0375902	0.0424094
Differentially expressed pyroptosis-related lncRNAs.
gene	conMean	treatMean	logFC	pValue	fdr
NFE2L1-DT	0.0491562	0.582722	3.56736	4.17118e-28	2.51939e-25
MAPKAPK5-AS1	3.33967	10.6051	1.66698	1.41232e-27	3.00598e-25
TMED2-DT	0.146979	0.645069	2.13384	1.53128e-27	3.00598e-25
CAPN10-DT	0.0999703	0.893912	3.16056	1.99072e-27	3.00598e-25
LINC01311	0.160059	1.21721	2.92691	5.04943e-27	5.91141e-25
MYLK-AS1	0.242946	1.89408	2.96279	6.67976e-27	5.91141e-25
ZKSCAN2-DT	0.154329	1.02651	2.73367	7.0449e-27	5.91141e-25
DDX11-AS1	0.0399134	0.53503	3.74468	7.82968e-27	5.91141e-25
LINC01089	0.615809	3.27763	2.4121	1.38568e-26	9.29947e-25
LINC02875	0.0831288	1.16144	3.80442	2.54174e-26	1.40293e-24
SNHG1	3.08886	16.484	2.41592	2.75088e-26	1.40293e-24
SREBF2-AS1	0.473932	2.51777	2.4094	2.78729e-26	1.40293e-24
DNAJC9-AS1	0.178828	1.0085	2.49558	5.22985e-26	2.42987e-24
THUMPD3-AS1	1.02829	3.84508	1.90276	9.40492e-26	3.83663e-24
GAS5	14.998	89.9923	2.58503	9.52805e-26	3.83663e-24
SNHG32	24.1353	98.8146	2.03358	1.38846e-25	5.19929e-24
CDKN2B-AS1	0.0264384	0.554276	4.3899	1.46338e-25	5.19929e-24
MAFG-DT	0.294278	4.00129	3.76521	1.79885e-25	6.03615e-24
ARRDC1-AS1	3.76394	9.60309	1.35125	2.48431e-25	7.7985e-24
BACE1-AS	1.39161	5.8036	2.0602	2.58229e-25	7.7985e-24
RUSC1-AS1	0.70487	4.46227	2.66235	3.94817e-25	1.09796e-23
ASB16-AS1	2.07717	7.14991	1.78331	3.9992e-25	1.09796e-23
SNHG7	3.52039	17.8309	2.34057	5.37099e-25	1.41047e-23
GARS1-DT	0.373784	1.38845	1.8932	6.18286e-25	1.55602e-23
SUV39H2-DT	0.362809	1.62661	2.16458	8.83998e-25	2.13574e-23
GIHCG	0.962597	5.19371	2.43176	1.18469e-24	2.75214e-23
HEIH	13.2049	34.6632	1.39234	1.23074e-24	2.75321e-23
SNHG20	0.898329	3.48986	1.95785	1.2949e-24	2.79329e-23
LENG8-AS1	0.469881	2.42072	2.36507	1.39741e-24	2.91047e-23
SNHG25	1.60673	12.9025	3.00545	1.47018e-24	2.95996e-23
SNHG10	1.12643	4.07882	1.8564	1.80072e-24	3.5085e-23
RNF139-AS1	0.089245	0.445627	2.31999	2.31904e-24	4.29461e-23
ZNF252P-AS1	0.039597	0.311597	2.97622	2.34639e-24	4.29461e-23
SNHG11	4.14371	13.955	1.75179	4.08833e-24	7.26279e-23
UBR5-AS1	1.67868	4.93642	1.55614	4.93552e-24	8.51729e-23
TMPO-AS1	0.555646	3.1454	2.501	7.36755e-24	1.21782e-22
APTR	2.74202	7.10004	1.37259	7.46018e-24	1.21782e-22
SUGT1-DT	0.210531	1.17343	2.47864	1.04468e-23	1.66049e-22
SNHG3	1.57048	9.02827	2.52325	1.47981e-23	2.29181e-22
STARD7-AS1	1.00695	2.42505	1.26802	1.87286e-23	2.75905e-22
MIR4435-2HG	0.923749	5.3691	2.53911	1.87286e-23	2.75905e-22
ZNF8-DT	0.949214	3.19893	1.75279	1.91982e-23	2.76089e-22
NDUFB2-AS1	0.31904	0.981867	1.62179	2.64751e-23	3.71883e-22
CCDC18-AS1	0.618583	2.78789	2.17214	3.83127e-23	5.14241e-22
LINC01138	0.560739	2.85208	2.34661	3.83127e-23	5.14241e-22
TMCO1-AS1	0.0555483	0.415881	2.90436	6.06751e-23	7.9669e-22
SNHG6	28.8643	119.768	2.05289	7.51767e-23	9.661e-22
PTOV1-AS1	1.17457	3.37218	1.52155	7.70356e-23	9.69364e-22
LINC01004	0.500136	2.27744	2.18702	8.08909e-23	9.97104e-22
CSGALNACT2-DT	0.0875989	0.482815	2.46249	1.3003e-22	1.52914e-21
TMEM147-AS1	0.456491	1.87541	2.03855	1.31647e-22	1.52914e-21
SNHG12	1.17623	4.89685	2.05768	1.31647e-22	1.52914e-21
TM4SF19-AS1	0.0601376	0.419191	2.80127	1.44106e-22	1.62268e-21
SBF2-AS1	0.580156	2.07816	1.84079	1.45074e-22	1.62268e-21
PXN-AS1	1.77471	5.0564	1.51053	3.06944e-22	3.37081e-21
ZEB1-AS1	0.683016	2.21473	1.69714	3.76587e-22	4.06176e-21
PRKAR2A-AS1	0.201101	1.02979	2.35637	4.04728e-22	4.2887e-21
ZNF213-AS1	1.23709	3.40523	1.4608	5.59393e-22	5.82541e-21
ALOX12-AS1	0.747945	1.8947	1.34096	6.08247e-22	6.2268e-21
LINC00205	0.725282	3.84841	2.40765	7.90961e-22	7.96234e-21
ZNF232-AS1	0.794049	3.97566	2.32389	8.59777e-22	8.5132e-21
ASMTL-AS1	1.50224	7.42776	2.30581	9.457e-22	9.21295e-21
LINC01011	0.327343	1.19399	1.86691	9.68476e-22	9.28507e-21
MELTF-AS1	0.276417	2.61622	3.24256	1.02782e-21	9.70003e-21
ZNF529-AS1	0.728207	2.4656	1.75952	1.05255e-21	9.78061e-21
ARHGAP27P1-BPTFP1-KPNA2P3	0.440736	1.5841	1.84567	1.30336e-21	1.19277e-20
ZNNT1	0.921339	4.30068	2.22276	1.35056e-21	1.21752e-20
CYTOR	1.80809	10.9698	2.601	1.43301e-21	1.27285e-20
FOXD2-AS1	0.558426	4.30899	2.94791	1.61314e-21	1.41208e-20
HNRNPD-DT	0.171805	0.781316	2.18513	1.90314e-21	1.64214e-20
MZF1-AS1	0.535595	1.70736	1.67255	1.97217e-21	1.67774e-20
NOP14-AS1	1.26298	2.93825	1.21813	2.49676e-21	2.09451e-20
SNHG21	0.482356	1.75343	1.86201	2.7758e-21	2.29669e-20
ZNF433-AS1	0.205643	0.71266	1.79307	3.12211e-21	2.54832e-20
ZBTB11-AS1	0.685025	1.82927	1.41704	4.18616e-21	3.37126e-20
MCM3AP-AS1	0.13805	0.535718	1.95628	4.87402e-21	3.87356e-20
LINC00921	0.328243	1.03682	1.65933	5.67347e-21	4.45036e-20
LINC01703	0.309203	2.81418	3.18609	5.87522e-21	4.54953e-20
HAND2-AS1	0.786759	0.272686	-1.52868	6.61624e-21	5.05849e-20
SCAT2	0.171783	1.32651	2.94898	7.52303e-21	5.67989e-20
CTBP1-DT	1.84088	4.93499	1.42265	7.95423e-21	5.9313e-20
GPRC5D-AS1	0.992403	2.522	1.34557	9.46866e-21	6.97448e-20
ZNRD2-AS1	0.556548	1.35815	1.28706	1.08827e-20	7.91639e-20
ZFHX2-AS1	0.0842887	0.325364	1.94864	1.10095e-20	7.91639e-20
CH17-340M24.3	8.22038	23.5	1.51539	1.34039e-20	9.52468e-20
ELF3-AS1	1.06626	5.78215	2.43904	1.59399e-20	1.1195e-19
MIR194-2HG	0.290007	1.23671	2.09235	1.6312e-20	1.13246e-19
GEMIN7-AS1	0.155118	0.612816	1.98208	2.4405e-20	1.67507e-19
USP3-AS1	0.280865	0.719216	1.35655	2.67528e-20	1.81558e-19
RAD51-AS1	0.853302	2.86336	1.74658	2.73737e-20	1.83708e-19
COA6-AS1	2.55288	8.63369	1.75785	2.86585e-20	1.90217e-19
NRAV	2.03015	5.73963	1.49937	4.22826e-20	2.77595e-19
SNHG30	3.3608	10.5751	1.65379	4.79345e-20	3.11317e-19
SCAMP1-AS1	2.54593	6.34054	1.31642	4.90396e-20	3.15105e-19
C2orf49-DT	0.251358	0.784357	1.64177	5.13257e-20	3.26324e-19
PRANCR	1.01697	2.80096	1.46164	5.19135e-20	3.26623e-19
NIFK-AS1	1.40955	3.44193	1.28798	5.49539e-20	3.42187e-19
H1-10-AS1	0.35405	1.25081	1.82084	5.68619e-20	3.50455e-19
HCG27	0.29471	1.18998	2.01357	6.37073e-20	3.88679e-19
SLC30A6-DT	0.101992	0.628647	2.62379	6.44653e-20	3.8937e-19
MYG1-AS1	0.508408	1.95321	1.94179	7.38361e-20	4.41555e-19
CTC-338M12.4	0.287854	1.01945	1.82438	1.01372e-19	6.0028e-19
KTN1-AS1	0.359001	1.08401	1.59432	1.1349e-19	6.65512e-19
LINC02878	0.0859304	0.375711	2.12838	1.31379e-19	7.63012e-19
NCK1-DT	1.59188	3.84607	1.27266	1.64558e-19	9.46598e-19
LINC00894	0.104515	0.533023	2.35049	1.76027e-19	1.00302e-18
LINC01116	0.0740022	1.47509	4.31709	2.36669e-19	1.33596e-18
DPY19L3-DT	0.338644	1.86693	2.46283	2.69379e-19	1.50653e-18
BAIAP2-DT	4.28139	13.3658	1.64239	3.1493e-19	1.74512e-18
OTUD6B-AS1	4.04028	8.82264	1.12675	3.9787e-19	2.18467e-18
ZFAS1	16.0134	52.4342	1.71123	4.15957e-19	2.24818e-18
RNF216P1	2.9291	6.41782	1.13163	4.20604e-19	2.24818e-18
LINC02615	0.273349	1.09733	2.00518	4.20604e-19	2.24818e-18
LINC01355	0.266796	1.14217	2.09797	4.3971e-19	2.32969e-18
TMEM14B-DT	0.0346125	0.254338	2.87739	4.70287e-19	2.47003e-18
CCNT2-AS1	0.413152	1.33464	1.69171	4.96786e-19	2.58671e-18
SNHG4	0.12324	1.26888	3.36401	6.16437e-19	3.18229e-18
PTOV1-AS2	1.12202	4.24417	1.91938	7.00035e-19	3.58323e-18
MUC20-OT1	0.808302	2.27502	1.49291	8.16928e-19	4.14642e-18
ASH1L-AS1	0.730854	2.11712	1.53445	8.4438e-19	4.25005e-18
MIF4GD-DT	0.181445	0.908742	2.32434	1.32465e-18	6.61232e-18
POLR2J4	1.52081	3.37697	1.15089	1.33932e-18	6.63076e-18
MORF4L2-AS1	0.0895682	0.385884	2.10711	1.41432e-18	6.94513e-18
ZNF503-AS2	1.02352	2.79422	1.44891	1.64871e-18	8.03081e-18
LINC00294	2.14169	5.1299	1.26018	2.02847e-18	9.80156e-18
ATP6V0D1-DT	0.224075	0.692926	1.62872	2.07315e-18	9.93796e-18
LINC00628	0.0215792	0.288516	3.74093	2.24913e-18	1.06729e-17
HCG18	0.850506	2.55086	1.58459	2.26181e-18	1.06729e-17
LINC00653	0.161083	0.771823	2.26047	2.33659e-18	1.09403e-17
FBXL19-AS1	0.181389	1.00247	2.46639	2.60515e-18	1.21039e-17
CD27-AS1	3.32653	7.11769	1.09739	3.2014e-18	1.47606e-17
SEC24B-AS1	0.134793	0.380081	1.49556	4.01788e-18	1.83848e-17
PRR7-AS1	0.0239598	0.284523	3.56985	5.64365e-18	2.56298e-17
SNHG17	3.52498	9.87116	1.48561	6.31617e-18	2.8259e-17
MIR600HG	0.237101	1.15218	2.28079	6.31617e-18	2.8259e-17
CEP83-DT	0.0466374	0.22781	2.28828	8.42713e-18	3.74263e-17
LRRC8D-DT	0.266275	1.28453	2.27026	8.5264e-18	3.75908e-17
GMDS-DT	0.338476	0.702767	1.05399	9.69381e-18	4.2428e-17
TRIM52-AS1	5.40384	13.0914	1.27656	1.07856e-17	4.68667e-17
LINC01943	0.176507	0.948699	2.42622	1.83446e-17	7.91437e-17
TTC23L-AS1	0.433432	1.39985	1.6914	3.01343e-17	1.29086e-16
ARHGEF2-AS2	0.0306555	0.324836	3.40549	3.33584e-17	1.4189e-16
FAM111A-DT	0.681303	1.93337	1.50475	3.49108e-17	1.47456e-16
LINC01176	1.07777	3.23465	1.58557	3.60273e-17	1.51114e-16
C3orf35	0.12197	0.390856	1.68011	3.67918e-17	1.53257e-16
LINC00997	1.4332	3.19588	1.15698	3.87726e-17	1.60402e-16
DGUOK-AS1	0.278643	1.11279	1.99769	4.35083e-17	1.78769e-16
MALAT1	5.3302	16.4085	1.62219	4.58452e-17	1.85309e-16
CAHM	0.33414	1.21853	1.86661	4.6326e-17	1.85309e-16
POLH-AS1	0.252843	0.928312	1.87637	4.63272e-17	1.85309e-16
PITPNA-AS1	4.08076	11.9906	1.55499	4.63273e-17	1.85309e-16
PGLS-DT	0.304136	0.829515	1.44755	6.07738e-17	2.41496e-16
ZNF687-AS1	1.66256	4.9752	1.58135	6.27033e-17	2.47534e-16
ERVK13-1	0.465453	1.37794	1.5658	9.30498e-17	3.64949e-16
DUXAP8	0.0273609	0.442822	4.01654	9.57303e-17	3.73039e-16
LINC01772	0.0888622	0.284104	1.67678	1.05355e-16	4.07913e-16
GOSR2-DT	0.0285051	0.423443	3.89288	1.07218e-16	4.12482e-16
ADGRL1-AS1	0.363721	0.821137	1.17479	1.16825e-16	4.43787e-16
ZSCAN16-AS1	8.39648	19.4551	1.21229	1.29524e-16	4.88952e-16
STAG3L5P-PVRIG2P-PILRB	0.702209	1.72517	1.29676	1.45067e-16	5.44228e-16
LINC00847	5.23857	11.5789	1.14425	1.51164e-16	5.636e-16
DLEU2	0.45221	1.3278	1.55397	1.57514e-16	5.8367e-16
OTULIN-DT	0.119676	0.425952	1.83156	1.91449e-16	7.05093e-16
LINC01424	0.0278457	0.236853	3.08847	2.49087e-16	9.11808e-16
LINC01126	0.0781778	0.493717	2.65885	2.77071e-16	1.00814e-15
WAC-AS1	7.35684	15.8893	1.1109	2.9714e-16	1.07469e-15
TRAF3IP2-AS1	0.268806	0.632345	1.23414	3.22364e-16	1.15898e-15
EIF3J-DT	1.17133	2.78739	1.25076	3.75477e-16	1.34194e-15
LINC01278	2.958	6.22878	1.07433	3.99059e-16	1.41783e-15
LINC01719	0.280677	1.47913	2.39777	5.32567e-16	1.87018e-15
KMT2E-AS1	5.87482	15.49	1.39872	5.51737e-16	1.92629e-15
ARFGEF1-DT	0.049829	0.33358	2.74298	5.89568e-16	2.04655e-15
MIR4453HG	0.503528	1.40104	1.47636	6.7504e-16	2.32985e-15
DLGAP1-AS2	0.294132	1.137	1.9507	7.24316e-16	2.48572e-15
MED8-AS1	0.212056	0.913416	2.10683	9.50267e-16	3.24272e-15
LINC02614	0.102082	0.367542	1.84817	9.69068e-16	3.2883e-15
TFAP2A-AS1	0.0242669	0.749243	4.94837	1.14505e-15	3.86373e-15
KPNB1-DT	0.318244	0.829038	1.38131	1.20754e-15	4.05196e-15
SEMA3F-AS1	0.226342	0.628069	1.47242	1.21965e-15	4.07001e-15
ZNF775-AS1	0.0306567	0.387243	3.65897	1.43158e-15	4.75095e-15
THBS3-AS1	0.116093	0.489761	2.0768	1.57995e-15	5.2147e-15
MCCC1-AS1	0.160022	0.830465	2.37565	1.59217e-15	5.22647e-15
CYP4A22-AS1	0.0516318	0.383533	2.89302	1.71563e-15	5.60131e-15
GTSE1-DT	0.0820719	0.334518	2.02713	1.74177e-15	5.63747e-15
LINC01963	0.712428	2.34131	1.7165	1.74537e-15	5.63747e-15
C10orf95-AS1	1.78471	3.97648	1.1558	1.85246e-15	5.95152e-15
HEATR6-DT	0.177066	0.709115	2.00173	1.86772e-15	5.96879e-15
RASAL2-AS1	0.223383	0.688584	1.62411	2.06585e-15	6.56724e-15
SOCAR	0.0411687	0.284463	2.78862	2.43217e-15	7.69127e-15
ERICD	0.274546	0.889162	1.6954	3.06637e-15	9.64628e-15
CBR3-AS1	0.0961428	0.312625	1.70118	3.0967e-15	9.69122e-15
PRR34-AS1	2.28289	8.88137	1.95992	3.35023e-15	1.04306e-14
LINC00342	0.965763	3.08381	1.67497	3.51895e-15	1.08997e-14
MKLN1-AS	0.416437	1.37673	1.72508	3.58876e-15	1.10592e-14
FIRRE	0.0151309	0.291197	4.26642	4.52314e-15	1.38679e-14
HLA-F-AS1	0.435316	1.3381	1.62005	4.63033e-15	1.41249e-14
LINC02709	0.086431	0.474067	2.45547	4.74396e-15	1.43987e-14
NUTM2A-AS1	1.23506	2.50071	1.01776	4.76819e-15	1.43999e-14
MATN1-AS1	0.250903	0.651257	1.3761	4.9583e-15	1.48996e-14
KANSL1L-AS1	0.103556	0.375437	1.85816	5.05465e-15	1.51139e-14
STX18-AS1	0.129356	0.355935	1.46027	7.61067e-15	2.26446e-14
PSMA3-AS1	4.30087	8.84653	1.04048	9.51042e-15	2.81583e-14
ILRUN-AS1	5.13585	12.0677	1.23247	1.00784e-14	2.96943e-14
LINC01224	0.0117263	0.689124	5.87694	1.11554e-14	3.27019e-14
OSGEPL1-AS1	0.249165	0.627579	1.3327	1.12074e-14	3.27019e-14
C1orf220	0.176703	0.756536	2.09808	1.22823e-14	3.56658e-14
MMP25-AS1	0.726567	1.98262	1.44824	2.07158e-14	5.98678e-14
EIF2AK3-DT	0.439004	1.10892	1.33685	2.09146e-14	6.01545e-14
LINC00702	0.0605864	0.259403	2.09813	2.19361e-14	6.27933e-14
LINC02604	1.70447	4.21045	1.30465	2.86392e-14	8.15946e-14
YEATS2-AS1	0.0610049	0.238751	1.96851	3.17579e-14	9.00553e-14
BCDIN3D-AS1	0.158308	0.403016	1.3481	3.27085e-14	9.23176e-14
FAM182B	0.0251816	0.227602	3.17607	4.09694e-14	1.15095e-13
PAXBP1-AS1	0.237533	0.572354	1.26878	4.7286e-14	1.32226e-13
PANK2-AS1	0.585693	1.7686	1.59439	5.05056e-14	1.40578e-13
PSPC1-AS2	0.344355	1.10265	1.679	5.77573e-14	1.60025e-13
MRPS30-DT	0.110801	0.443505	2.00097	6.69389e-14	1.84617e-13
AKAP1-DT	3.17648	7.23288	1.18714	7.41987e-14	2.03709e-13
ANKH-DT	0.0866437	0.511604	2.56186	9.80736e-14	2.68038e-13
ODC1-DT	0.794607	1.80224	1.18148	1.0873e-13	2.95823e-13
NUDT19-DT	0.928669	3.00325	1.69329	1.26129e-13	3.41624e-13
UCKL1-AS1	0.0520849	0.248076	2.25184	1.30729e-13	3.51368e-13
RBFADN	0.0896438	0.313865	1.80787	1.3089e-13	3.51368e-13
SNHG8	48.255	106.538	1.14262	1.71104e-13	4.57286e-13
LINC00852	0.371846	0.839776	1.1753	2.23393e-13	5.94401e-13
SNHG9	7.89264	24.2563	1.61978	2.83425e-13	7.50828e-13
LINC00471	0.131821	0.440903	1.74188	2.9059e-13	7.66447e-13
ZNF407-AS1	1.98644	3.99314	1.00734	3.19124e-13	8.38047e-13
REPIN1-AS1	0.725881	2.39632	1.72302	3.30577e-13	8.64367e-13
WARS2-AS1	0.430927	1.17674	1.44928	3.49556e-13	9.1005e-13
NRSN2-AS1	0.900519	2.61624	1.53866	3.59229e-13	9.31219e-13
BAALC-AS1	0.0880042	0.470697	2.41915	4.2284e-13	1.08218e-12
IPO9-AS1	0.0835913	0.288515	1.78722	4.57891e-13	1.16695e-12
PDC-AS1	0.13502	0.468468	1.79477	4.86128e-13	1.2337e-12
XPC-AS1	0.197963	0.514296	1.37736	4.97936e-13	1.25838e-12
CTBP1-AS	0.176958	0.57519	1.70063	5.47301e-13	1.36938e-12
RPH3AL-AS1	0.653507	0.303543	-1.1063	5.4866e-13	1.36938e-12
MRPS9-AS1	0.104516	0.427502	2.03221	6.09952e-13	1.5161e-12
LINC00910	0.473424	1.10413	1.2217	6.52687e-13	1.61567e-12
RUFY1-AS1	0.0743597	0.244419	1.71676	6.81103e-13	1.67625e-12
EPB41L4A-AS1	4.542	9.61627	1.08215	6.82712e-13	1.67625e-12
LINC01605	0.0461497	0.488606	3.40428	7.42104e-13	1.8147e-12
LINC01775	0.0135652	0.294421	4.4399	8.45292e-13	2.0587e-12
YTHDF3-DT	2.13378	5.47709	1.36	9.01524e-13	2.18683e-12
ARF4-AS1	0.384101	1.16888	1.60558	1.00353e-12	2.42453e-12
LINC00862	0.143825	0.846823	2.55775	1.0214e-12	2.45787e-12
PRKCZ-AS1	0.343856	1.05822	1.62176	1.0308e-12	2.47066e-12
N4BP2L2-IT2	0.198952	0.528877	1.41051	1.05877e-12	2.52765e-12
ZNF32-AS2	0.190932	0.812271	2.0889	1.22743e-12	2.91877e-12
KDM2B-DT	0.134326	0.504373	1.90875	1.306e-12	3.09342e-12
LINC00623	1.83625	4.53829	1.30538	1.4975e-12	3.53316e-12
LINC01730	0.0717084	0.515759	2.84648	1.51338e-12	3.55673e-12
SLC9A3R1-AS1	6.02409	16.8477	1.48374	1.78731e-12	4.18425e-12
PPP4R3B-DT	1.14561	2.50882	1.13089	2.07638e-12	4.84222e-12
ZNF32-AS1	0.151837	0.6108	2.00818	2.76927e-12	6.43323e-12
NFYC-AS1	0.302111	0.978727	1.69583	3.1357e-12	7.25657e-12
ADNP-AS1	0.822358	1.64803	1.00291	3.93338e-12	8.9991e-12
LINC00926	0.266512	0.81589	1.61417	4.14399e-12	9.44516e-12
NAV2-AS6	0.254409	0.909945	1.83863	4.21564e-12	9.53871e-12
HMGN3-AS1	0.344667	0.94735	1.45869	4.21662e-12	9.53871e-12
IRF1-AS1	0.795724	1.62169	1.02716	5.10265e-12	1.15e-11
MIATNB	0.49381	1.09693	1.15145	5.37443e-12	1.20675e-11
ZNF566-AS1	0.635235	1.60193	1.33445	5.42109e-12	1.21272e-11
THAP9-AS1	3.37845	6.87796	1.02562	6.61069e-12	1.46796e-11
LINC02152	0.00384452	0.228229	5.89153	7.42344e-12	1.6424e-11
PDXDC2P-NPIPB14P	0.833286	1.92169	1.20549	7.78334e-12	1.71574e-11
SMG7-AS1	0.117106	0.273989	1.2263	8.40772e-12	1.84664e-11
SF1-DT	0.297087	0.827634	1.47811	8.64202e-12	1.8844e-11
IER3-AS1	0.708497	1.5969	1.17244	8.70074e-12	1.89038e-11
DNAJC3-DT	1.07339	2.80687	1.38678	1.07723e-11	2.33207e-11
L3MBTL2-AS1	0.139922	0.410501	1.55276	1.71733e-11	3.69134e-11
IDH1-AS1	1.1381	3.15618	1.47155	1.91673e-11	4.10533e-11
GHET1	0.111003	0.39565	1.83362	2.18255e-11	4.65816e-11
LINC01376	0.130383	0.296766	1.18657	2.95196e-11	6.25609e-11
LINC00665	0.298375	3.94616	3.72525	4.10021e-11	8.62902e-11
LINC01615	0.0298019	0.508368	4.0924	4.14239e-11	8.68751e-11
VAC14-AS1	0.123753	0.787103	2.66908	5.10403e-11	1.06672e-10
CTB-178M22.2	0.103412	0.639556	2.62866	5.69279e-11	1.18567e-10
PKD1P6-NPIPP1	0.256922	0.572054	1.15482	6.09328e-11	1.26039e-10
UBE2Q1-AS1	0.121896	0.588968	2.27254	6.26683e-11	1.29186e-10
DNAJC27-AS1	0.32612	0.688308	1.07765	7.12121e-11	1.463e-10
LINC02035	0.729909	1.73301	1.2475	8.18327e-11	1.67549e-10
LINC00174	1.32904	2.74115	1.0444	1.00317e-10	2.047e-10
PAN3-AS1	0.320409	0.768475	1.26208	1.4913e-10	3.03281e-10
IGBP1-AS1	0.0934912	0.341258	1.86796	1.53241e-10	3.10596e-10
SH3BP5-AS1	0.798176	1.77544	1.1534	1.60334e-10	3.23885e-10
ZNF350-AS1	0.0564424	0.24189	2.0995	1.89497e-10	3.81521e-10
DANCR	10.8643	31.7937	1.54915	1.97522e-10	3.96357e-10
TTC39A-AS1	0.0340926	0.375993	3.46317	2.63004e-10	5.26007e-10
HCP5	7.75231	22.3064	1.52476	3.39232e-10	6.76224e-10
LINC00944	0.107989	1.22578	3.50475	3.65834e-10	7.26855e-10
RNF213-AS1	0.0829419	0.249473	1.58871	3.78794e-10	7.47686e-10
NARF-IT1	0.0971631	0.359149	1.8861	3.94069e-10	7.75302e-10
LINC02449	0.0776901	0.311143	2.00178	3.97733e-10	7.7997e-10
LINC00539	0.0857504	0.254669	1.57041	3.99373e-10	7.80652e-10
MAP3K4-AS1	0.201521	0.575162	1.51304	4.50445e-10	8.77641e-10
LINC02019	0.130647	0.378221	1.53355	4.98766e-10	9.68664e-10
PATJ-DT	0.0351749	0.304407	3.11339	5.2135e-10	1.00928e-09
NEAT1	13.5819	34.0008	1.32388	5.65253e-10	1.09078e-09
LINC01117	0.0155156	0.276772	4.15691	6.31443e-10	1.21462e-09
FAM13A-AS1	0.196621	0.454129	1.20769	6.55465e-10	1.25683e-09
TBC1D8-AS1	0.252703	0.593759	1.23243	9.39626e-10	1.79033e-09
PARD3-AS1	0.518007	1.56034	1.59082	9.4285e-10	1.79082e-09
MIR4733HG	0.404818	1.20106	1.56896	1.04248e-09	1.97385e-09
MID1IP1-AS1	0.812335	2.8321	1.80172	1.13257e-09	2.13107e-09
LINC01269	0.0311264	0.830771	4.73824	1.17076e-09	2.19608e-09
SAPCD1-AS1	0.234614	0.770303	1.71513	1.17954e-09	2.2057e-09
ATXN7L3-AS1	0.0756057	0.325432	2.10579	1.18733e-09	2.21342e-09
LINC00957	0.789834	1.97219	1.32017	1.42728e-09	2.6444e-09
KLHDC7B-DT	0.65242	2.12312	1.70231	1.47123e-09	2.7175e-09
LINC01521	0.258074	0.801199	1.63437	1.47704e-09	2.71991e-09
PIK3IP1-DT	0.185196	0.499933	1.43268	1.60118e-09	2.93956e-09
LINC00630	0.13301	0.385436	1.53496	1.62453e-09	2.97338e-09
MFF-DT	0.109974	0.249629	1.18262	1.75286e-09	3.19856e-09
FMR1-IT1	0.230468	0.891359	1.95144	1.86889e-09	3.40003e-09
LINC00641	0.458358	1.17551	1.35874	1.9344e-09	3.50865e-09
GRASLND	0.0238505	0.366892	3.94327	1.97893e-09	3.57867e-09
TAPT1-AS1	0.460349	0.982204	1.09329	2.0551e-09	3.70531e-09
DNAH10OS	0.203461	0.808412	1.99034	2.13419e-09	3.83646e-09
HOXB-AS1	0.240266	0.780473	1.69971	2.18308e-09	3.9127e-09
SEMA6A-AS1	0.148598	0.349798	1.23511	2.23309e-09	3.9905e-09
RRN3P2	0.276075	0.577008	1.06353	2.51908e-09	4.48827e-09
SNHG29	45.1769	102.837	1.1867	3.58118e-09	6.36186e-09
BET1-AS1	0.395434	0.817081	1.04704	3.97422e-09	6.99852e-09
RFX3-AS1	0.155449	0.614162	1.98218	4.43934e-09	7.79465e-09
ZNF346-IT1	0.116988	0.325735	1.47734	4.91549e-09	8.60567e-09
MACORIS	0.207213	0.659186	1.66957	5.2989e-09	9.25011e-09
LINC00863	0.580159	1.22638	1.07988	6.236e-09	1.08546e-08
PSMB8-AS1	5.50957	11.8377	1.10337	7.21994e-09	1.25312e-08
SNHG28	0.0845824	0.383408	2.18045	7.48172e-09	1.29483e-08
CAMTA1-DT	0.599835	1.55401	1.37336	7.70925e-09	1.32661e-08
LINC01948	0.0768473	0.478586	2.63871	1.07741e-08	1.83311e-08
LINC01515	0.154913	0.378321	1.28815	1.19148e-08	2.0215e-08
AP4B1-AS1	0.085756	0.255734	1.57633	1.28229e-08	2.16948e-08
GP6-AS1	0.195182	0.594982	1.60802	1.40515e-08	2.3707e-08
C2-AS1	0.611511	1.71605	1.48864	1.65695e-08	2.78774e-08
LINC01273	1.32159	2.85799	1.11272	1.75479e-08	2.94414e-08
LINC01876	0.064185	0.478056	2.89687	2.00988e-08	3.34426e-08
LINC00839	0.137206	0.99131	2.85299	2.09607e-08	3.46881e-08
NCBP2-AS1	0.0847546	0.315005	1.89401	2.12459e-08	3.50615e-08
LINC02611	0.0747268	0.260276	1.80034	2.22785e-08	3.66655e-08
ITPR1-DT	0.202272	0.547181	1.43572	2.40112e-08	3.94096e-08
PCOTH	0.115669	0.324733	1.48925	2.45846e-08	4.02415e-08
SCTR-AS1	0.246352	2.83789	3.52603	2.98003e-08	4.8647e-08
WASHC5-AS1	0.121712	0.364378	1.58196	3.20929e-08	5.22482e-08
MGC16275	0.140852	0.363703	1.36858	3.26761e-08	5.30547e-08
LINC00519	0.0139756	0.304422	4.44509	3.36713e-08	5.4524e-08
KIF1C-AS1	0.253833	0.60652	1.25668	4.52906e-08	7.29481e-08
ANKRD10-IT1	2.11542	6.37181	1.59076	4.74224e-08	7.61785e-08
SNHG19	25.3038	67.8903	1.42385	7.28831e-08	1.16459e-07
SERTAD3-AS1	0.109203	0.347453	1.6698	7.63066e-08	1.21607e-07
ARHGEF35-AS1	0.0895818	0.307635	1.77994	8.40814e-08	1.33645e-07
ENO1-AS1	0.228659	0.754862	1.72302	8.74459e-08	1.38628e-07
MANEA-DT	0.136011	0.340787	1.32514	8.81764e-08	1.3942e-07
BACH1-IT1	0.196541	0.450405	1.19639	9.09276e-08	1.43395e-07
LINC00996	0.146262	0.417378	1.5128	1.05781e-07	1.66384e-07
TRAPPC12-AS1	0.359433	1.0788	1.58563	1.15233e-07	1.80313e-07
CHROMR	0.648897	1.37135	1.07954	1.1953e-07	1.86553e-07
LINC01675	0.0393634	0.434367	3.46399	2.44498e-07	3.79359e-07
CASC15	0.0480241	0.339179	2.82022	2.4495e-07	3.79359e-07
HM13-IT1	0.466192	1.11532	1.25847	2.53906e-07	3.91222e-07
APOA1-AS	0.151331	0.438382	1.53448	2.7369e-07	4.20633e-07
LINC00941	0.0391082	0.583711	3.89971	3.49538e-07	5.33133e-07
ZNF497-AS1	0.306517	0.643926	1.07093	3.71781e-07	5.65631e-07
LINC00265	0.267857	0.737888	1.46194	5.19415e-07	7.86283e-07
CENATAC-DT	0.716358	1.50812	1.074	5.75372e-07	8.66645e-07
FMNL1-DT	0.281325	0.795251	1.49917	6.28971e-07	9.45021e-07
SNHG15	2.2565	5.03461	1.15779	7.79929e-07	1.16603e-06
MIR181A2HG	0.152966	0.719207	2.2332	8.16608e-07	1.21785e-06
ACBD3-AS1	0.126305	0.406742	1.6872	1.02203e-06	1.50563e-06
KLF3-AS1	0.243672	0.668854	1.45675	1.05366e-06	1.54845e-06
RFX5-AS1	0.451187	0.973487	1.10944	1.20424e-06	1.76116e-06
ZNF528-AS1	0.303919	1.11393	1.8739	1.40997e-06	2.05706e-06
DHX35-DT	1.41474	3.89632	1.46158	1.62384e-06	2.36337e-06
CCR5AS	0.228367	0.796586	1.80247	1.76837e-06	2.56139e-06
ADAMTSL4-AS2	0.492954	1.08589	1.13936	1.79093e-06	2.58785e-06
SLC6A1-AS1	0.378837	1.53563	2.01918	1.81856e-06	2.6215e-06
GAS6-DT	0.260666	0.70822	1.44199	1.88057e-06	2.70444e-06
LINC02100	0.169736	0.640774	1.91652	2.04742e-06	2.93739e-06
PART1	0.00172988	0.512985	8.21211	2.13183e-06	3.04973e-06
UNC5B-AS1	0.0324623	0.240305	2.88803	2.13582e-06	3.04973e-06
LINC02195	0.147609	0.60227	2.02863	2.42043e-06	3.43178e-06
LAMC1-AS1	0.130854	0.501397	1.93799	2.59835e-06	3.67541e-06
LINC01124	2.35268	9.28851	1.98114	3.04836e-06	4.3019e-06
ACAP2-IT1	0.09197	0.239744	1.38226	3.07136e-06	4.32333e-06
LINC01436	0.222638	4.89648	4.45897	3.0803e-06	4.32333e-06
HCG15	0.208477	0.738052	1.82383	3.91966e-06	5.48027e-06
PSMD6-AS2	0.116965	0.268072	1.19654	4.28506e-06	5.97731e-06
DCUN1D2-AS	0.0621869	0.264275	2.08736	4.84225e-06	6.73899e-06
TP73-AS3	0.0819317	0.734255	3.16379	5.15696e-06	7.1277e-06
MIR325HG	0.0633423	0.671973	3.40716	5.96131e-06	8.20189e-06
GATA2-AS1	0.208939	1.08949	2.38249	6.32631e-06	8.6843e-06
MIAT	0.144328	0.503411	1.80238	7.185e-06	9.84067e-06
KRTAP5-AS1	0.0622937	0.400027	2.68294	7.31814e-06	1.00003e-05
LCMT1-AS1	0.121424	0.252075	1.0538	8.09017e-06	1.10304e-05
NRIR	0.268692	0.647664	1.26929	8.39007e-06	1.14135e-05
LINC02550	0.126056	0.472235	1.90545	8.80455e-06	1.19237e-05
RAP2C-AS1	0.296297	0.594569	1.0048	9.62354e-06	1.30036e-05
LINC01978	0.0703223	0.327923	2.2213	1.37773e-05	1.84922e-05
ZNF197-AS1	0.0651018	0.239079	1.87672	1.40804e-05	1.88571e-05
LINC01094	0.148614	0.496784	1.74105	1.55277e-05	2.07495e-05
SENCR	0.469551	0.985376	1.06939	1.67883e-05	2.23843e-05
CD2AP-DT	2.92606	6.44198	1.13854	1.82425e-05	2.42698e-05
ZBTB40-IT1	0.0506934	0.234899	2.21217	1.93087e-05	2.55195e-05
LINC01619	0.106064	0.426443	2.00742	2.42616e-05	3.17874e-05
ITGB2-AS1	0.566007	1.28153	1.17897	2.45358e-05	3.20771e-05
LINC02038	0.120112	0.60924	2.34262	2.55383e-05	3.33156e-05
LINC02298	0.321826	1.87414	2.54188	2.76694e-05	3.59405e-05
LINC01697	0.00625699	0.380076	5.92468	5.2263e-05	6.71635e-05
MIR210HG	1.08217	3.87223	1.83923	6.9085e-05	8.84054e-05
JMJD1C-AS1	0.226096	0.527222	1.22148	7.23696e-05	9.24128e-05
LINC01857	0.650354	1.46829	1.17484	8.07053e-05	0.00010284
ETV7-AS1	0.0965812	0.31162	1.68997	8.2681e-05	0.000105135
GLYCTK-AS1	0.118318	0.24612	1.05669	9.59361e-05	0.000121734
MIR155HG	0.435745	0.998943	1.19692	0.000116165	0.00014648
RAMP2-AS1	0.18333	0.775143	2.08002	0.000127762	0.000160767
RSL1D1-DT	0.130596	0.308067	1.23814	0.000160746	0.000201433
MIR222HG	0.353229	0.770192	1.12462	0.00017238	0.000215565
OBSCN-AS1	0.0510123	0.229447	2.16924	0.000185033	0.000230432
LINC00504	0.0869372	0.346488	1.99476	0.000290998	0.00036017
HOMER3-AS1	0.11558	0.260137	1.17038	0.000294227	0.000363422
LINC01694	0.0199757	0.305201	3.93344	0.000371854	0.000457434
PFKP-DT	0.0719018	0.23507	1.70899	0.000398637	0.000488391
ITGB1-DT	1.39432	4.30393	1.6261	0.000427803	0.000523062
PABPC4-AS1	0.0898382	0.222963	1.3114	0.000597148	0.000727172
ARHGAP29-AS1	0.0558248	0.295721	2.40526	0.000743936	0.000902284
PRSS30P	0.0704175	0.289476	2.03944	0.000934645	0.00113131
LINC01836	0.571265	2.46675	2.11038	0.00120666	0.00145473
RHOA-IT1	0.111941	0.240719	1.10461	0.00154216	0.00185551
ALG13-AS1	0.255565	0.609843	1.25475	0.0015507	0.00186207
LINC01638	0.0545539	0.24455	2.16437	0.00175594	0.00210017
SNHG14	0.525857	1.77538	1.75539	0.00195392	0.00233235
LINC02041	0.199181	3.07996	3.95076	0.00199536	0.00237712
LINC02361	0.330191	0.738367	1.16104	0.00245888	0.00291208
ABALON	0.276784	0.606639	1.13208	0.00267643	0.00316353
NPTN-IT1	0.0901311	0.233575	1.37379	0.0034472	0.00402729
OSMR-AS1	0.146345	0.346626	1.24401	0.00369525	0.00430874
STARD4-AS1	0.306659	0.670159	1.12787	0.00461191	0.00535691
LOXL1-AS1	0.11776	0.617033	2.3895	0.00477286	0.00553322
LINC00654	0.170716	0.518887	1.60382	0.00481069	0.00556639
ZKSCAN7-AS1	0.107949	0.256769	1.25013	0.00622382	0.00714674
LINC01106	0.132821	0.343084	1.36908	0.00689869	0.00790666
SOCS3-DT	0.238421	0.827472	1.7952	0.012639	0.0142425
LINC02586	0.119143	0.251656	1.07876	0.013834	0.01556
DUBR	0.227108	0.552745	1.28323	0.013869	0.0155704
LINC01504	0.168461	0.350444	1.05677	0.0150755	0.0168935
PAX8-AS1	0.351304	1.29346	1.88044	0.0180401	0.0200298
TRBV11-2	0.26233	0.582644	1.15123	0.0297993	0.0329648
